# Supplementary material
Source: PubMed Central journal article supplement (PMC3375236)

## **SUPPLEMENTAL MATERIAL**

**Supplemental Table 1: Rabbit neurological deficit grading scale (from ref <sup>23</sup>)**

|                                   |    | Maximum score |
|-----------------------------------|----|---------------|
| <u>Level of consciousness</u>     |    |               |
| Normal                            | 0  |               |
| Clouded                           | 5  |               |
| Stuporous                         | 10 |               |
| Comatose                          | 25 | 25            |
| <u>Respiration</u>                |    |               |
| Normal                            | 0  |               |
| Abnormal                          | 5  | 5             |
| <u>Cranial nerves</u>             |    |               |
| Vision                            | 1  |               |
| Light reflex                      | 1  |               |
| Oculocephalic                     | 1  |               |
| Corneal                           | 1  |               |
| Facial sensation                  | 1  |               |
| Auditory                          | 1  |               |
| Gag reflex                        | 1  | 7             |
| <u>Motor and sensory function</u> |    |               |
| Flexor response to pain (Front)   | 2  |               |
| Flexor response to pain (Rear)    | 2  |               |
| Righting reflex                   | 10 | 14            |
| <u>Gait</u>                       |    |               |
| Normal                            | 0  |               |
| Minimal ataxia                    | 5  |               |
| Moderate ataxia                   | 10 |               |
| Able to stand                     | 15 |               |
| Unable to stand                   | 20 |               |
| No purposeful movement            | 25 | 25            |
| <u>Behavior</u>                   |    |               |
| Grooming                          | 4  |               |
| Eating/drinking                   | 10 |               |
| Exploring                         | 10 | 24            |
| <b>Total</b>                      |    | <b>100</b>    |

**Supplemental Table 2: Histological cerebral lesion severity grading scale (from ref <sup>23</sup>)**

|                                          | Score |
|------------------------------------------|-------|
| <u>Neocortex</u>                         |       |
| Normal                                   | 0     |
| Rare ischemic neurons (<10%)             | 1     |
| Frequent ischemic neurons (10-50%)       | 2     |
| Majority of neurons ischemic (>50%)      | 3     |
| <u>Hippocampus</u>                       |       |
| Normal                                   | 0     |
| Rare ischemic pyramidal or granule cells | 1     |
| Focal ischemic damage                    | 2     |
| Severe, diffuse ischemic damage          | 3     |
| <u>Cerebellum</u>                        |       |
| Normal                                   | 0     |
| Rare ischemic Purkinje cells             | 1     |
| 10-50% ischemic Purkinje cells           | 2     |
| >50% ischemic Purkinje cells             | 3     |

**Supplemental Table 3:** Histological lesion severity grading scale for the kidney, liver, heart and lung. For this last organ, we assessed two separate scores for the cardiogenic lesions and the infectious complication, respectively.

|                                          | Score |
|------------------------------------------|-------|
| <i><u>Kidney</u></i>                     |       |
| Normal                                   | 0     |
| Dilated regenerative proximal tubule     | 1     |
| Focal scar fibrosis                      | 2     |
| Extensive scar fibrosis                  | 3     |
| <i><u>Liver</u></i>                      |       |
| Normal                                   | 0     |
| Limited clarification of hepatocytes     | 1     |
| Moderate clarification of hepatocytes    | 2     |
| Extensive clarification of hepatocytes   | 3     |
| <i><u>Heart</u></i>                      |       |
| Normal                                   | 0     |
| Very rare foci of cardiomyocyte necrosis | 1     |
| Rare foci of cardiomyocyte necrosis      | 2     |
| Frequent foci of cardiomyocyte necrosis  | 3     |
| <i><u>Lung (cardiogenic lesion)</u></i>  |       |
| Normal                                   | 0     |
| Limited congestion and/or serous edema   | 1     |
| Moderate congestion and/or serous edema  | 2     |
| Extended congestion and/or serous edema  | 3     |
| <i><u>Lung (infection)</u></i>           |       |
| Normal                                   | 0     |
| Limited foci of bronchopneumia           | 1     |
| Moderate foci of bronchopneumia          | 2     |
| Extended foci of bronchopneumia          | 3     |

**Supplemental Table 4:** Hemodynamic parameters in surviving rabbits after 7 days following cardiac arrest.

|                                                       | <i>n</i> | Conscious state | Anesthesia |
|-------------------------------------------------------|----------|-----------------|------------|
| <u>Heart rate (beat/min)</u>                          |          |                 |            |
| Sham                                                  | 5        | 254±19          | 282±9      |
| Control 5'                                            | 5        | 219±14          | 261±17     |
| H-TLV 5'                                              | 9        | 258±18          | 261±18     |
| Control 10'                                           | 0        | -               | -          |
| H-TLV 10'                                             | 7        | 230±14          | 273±34     |
| Saline 10'                                            | 2        | 247±2           | 246±20     |
| N-TLV 10'                                             | 1        | 302             | *          |
| <u>Mean arterial pressure (mmHg)</u>                  |          |                 |            |
| Sham                                                  | 5        | 81±8            | 82±4       |
| Control 5'                                            | 5        | 98±11           | 83±5       |
| H-TLV 5'                                              | 9        | 100±2           | 93±7       |
| Control 10'                                           | 0        | -               | -          |
| H-TLV 10'                                             | 7        | 94±6            | 94±10      |
| Saline 10'                                            | 2        | 89±11           | 81±15      |
| N-TLV 10'                                             | 1        | 90              | *          |
| <u>End diastolic left ventricular pressure (mmHg)</u> |          |                 |            |
| Sham                                                  | 5        | -               | 3.6±0.6    |
| Control 5'                                            | 5        | -               | 3.3±0.8    |
| H-TLV 5'                                              | 9        | -               | 3.8±1.1    |
| Control 10'                                           | 0        | -               | -          |
| H-TLV 10'                                             | 7        | -               | 2.7±0.5    |
| Saline 10'                                            | 2        | -               | 6.0±1.6    |
| N-TLV 10'                                             | 1        | -               | *          |
| <u>dP/dt max (mmHg/s)</u>                             |          |                 |            |
| Sham                                                  | 5        | -               | 7182±1313  |
| Control 5'                                            | 5        | -               | 7455±927   |
| H-TLV 5'                                              | 9        | -               | 7132±1157  |
| Control 10'                                           | 0        | -               | -          |
| H-TLV 10'                                             | 7        | -               | 6518±1958  |
| Saline 10'                                            | 2        | -               | 4810±1169  |
| N-TLV 10'                                             | 1        | -               | *          |
| <u>dP/dt min (mmHg/s)</u>                             |          |                 |            |
| Sham                                                  | 5        | -               | -5364±914  |
| Control 5'                                            | 5        | -               | -6156±1251 |
| H-TLV 5'                                              | 9        | -               | -6107±758  |
| Control 10'                                           | 0        | -               | -          |
| H-TLV 10'                                             | 7        | -               | -6323±1426 |
| Saline 10'                                            | 2        | -               | -4939±2772 |
| N-TLV 10'                                             | 1        | -               | *          |

TLV, total liquid ventilation; H-TLV, hypothermic TLV; N-TLV, normothermic TLV; Saline, hypothermia induced by intravenous administration of cold saline combined to external cooling; dP/dt max, maximal positive left ventricular rate of pressure development; dP/dt min, maximal negative left

*ventricular rate of pressure development, \*; data not available since the animal died during anesthesia.*

**Supplemental Figure 1:** Schematic representation of the prototype of liquid ventilator.

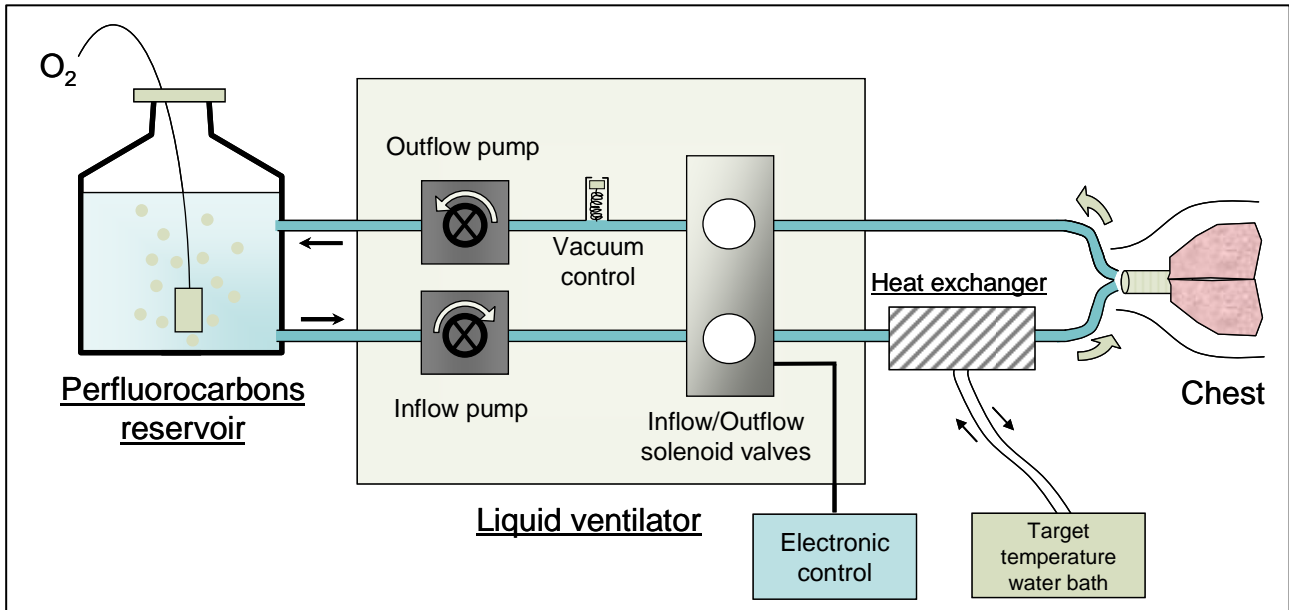

**Supplemental Figure 2:** Troponin I blood levels (left panel) and myocardial caspase 3 activity (right panel) in rabbits submitted to 10 min of cardiac arrest under control conditions or with hypothermic liquid ventilation after resumption of spontaneous circulation (Control<sub>10'</sub> and H-TLV<sub>10'</sub>, respectively). Caspase 3 activity assays were performed in myocardial samples withdrawn 60 min after the cardiac arrest episode.

\*  $p < 0.05$  vs corresponding control;  $n = 8$  in each experimental group; H-TLV, hypothermic total liquid ventilation.

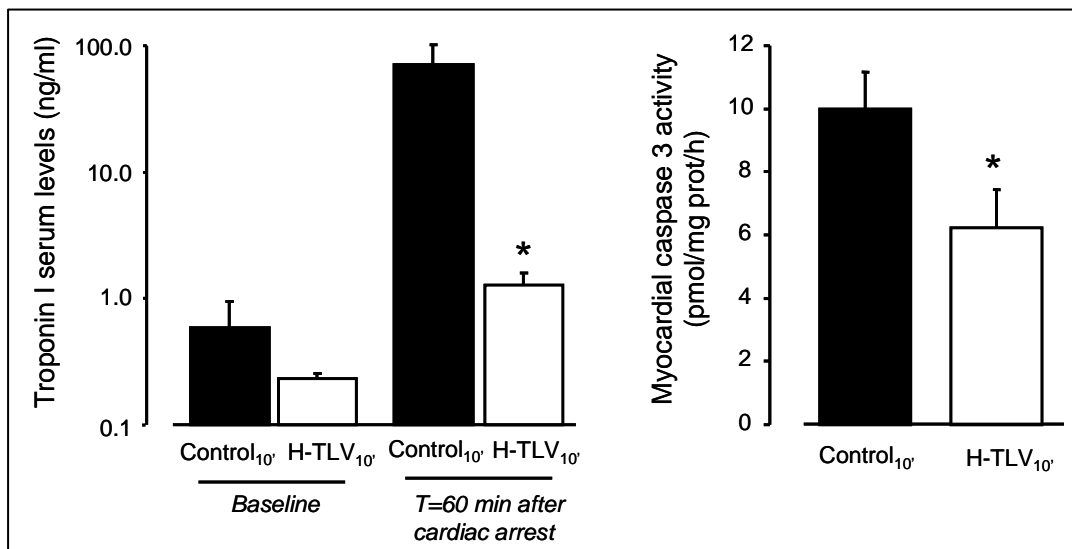

Supplement: halms623259-supplement_1.pdf [file halms623259-supplement_1.pdf]
